# Supplementary material for: Effects of shading stress on endogenous hormone levels in Eleutherococcus giraldii: hormonal dynamics and growth strategy analysis
Source: PeerJ. 2025 Oct 1;13:e20135. doi: 10.7717/peerj.20135 (PMC12495949; doi:10.7717/peerj.20135)
Supplement: Supplemental Information 1 — All measurements and statistical analyses underlying the figures in the manuscript. [file peerj-13-20135-s001.xlsx]

## Sheet: Figure 3
The values used to build graphs
Fig 3A			ABA					Fig 3C		iPA						Fig 3E		GA3
Time	Group							Time	Group							Time	Group
	CK	Er±	S1	Er±	S2	Er±			CK	Er±	S1	Er±	S2	Er±			CK	Er±	S1	Er±	S2	Er±
2025-07-15	241.62	22.63	279.96	32.01	265.09	62.69		2025-07-15	32.9	3.47	36.45	3.37	37.62	5.63		2025-07-15	333.82	46.75	387.39	58.68	353.36	49.73
2025-07-31	421.09	86.39	491.55	145.93	443.11	125.82		2025-07-31	58.07	9.41	68.95	11.97	82.94	6.23		2025-07-31	399.68	103.25	565.14	65.75	581.1	125.32
Fig 3B			IAA					Fig 3D		ZR
Time	Group							Time	Group
	CK	Er±	S1	Er±	S2	Er±			CK	Er±	S1	Er±	S2	Er±
2025-07-15	39.6	6.23	40.27	13.27	37.25	11.76		2025-07-15	7	1.78	8.24	2.64	7.24	1.76
2025-07-31	58	14.36	56.85	9.19	57.24	10.26		2025-07-31	8.21	1.9	8.76	1.44	11.74	1.14
Primary observations
ABA					IAA					iPA					ZR					GA3
Time	Group				Time	Group				Time	Group				Time	Group				Time	Group
	CK	S1	S2			CK	S1	S2			CK	S1	S2			CK	S1	S2			CK	S1	S2
2025-07-15	249.784	309.275	245.411		2025-07-15	42.935	66.221	36.708		2025-07-15	35.703	39.822	39.216		2025-07-15	8.411	10.621	5.492		2025-07-15	291.377	472.903	359.449
	228.793	263.777	226.17			36.708	38.603	25.065			38.126	33.523	35.946			10.287	7.326	8.16			423.74	382.14	285.074
	241.038	290.89	352.987			32.646	40.769	56.473			33.039	38.368	48.423			6.242	6.284	10.663			327.934	338.019	422.479
	280.395	273.398	349.488			42.664	38.332	49.163			30.374	37.642	32.917			6.117	7.91	6.951			286.334	383.401	403.57
	244.536	319.752	194.684			49.975	36.437	28.314			32.796	38.974	38.368			5.2	12.581	5.742			358.189	446.431	349.364
	205.179	222.671	221.797			32.646	21.274	27.772			27.345	30.374	30.858			5.742	4.699	6.451			315.328	301.462	300.201
2025-07-31	541.833	649.733	356.861		2025-07-31	77.293	47.218	45.786		2025-07-31	64.171	59.45	82.042		2025-07-31	8.581	8.228	13.17		2025-07-31	601.848	579.503	601.848
	453.751	381.083	623.309			31.225	74.19	77.055			44.783	77.321	89.459			9.052	10.385	10.699			356.049	646.539	783.803
	301.809	610.096	367.871			51.037	51.276	52.23			56.584	79.344	74.624			5.208	11.052	11.131			311.358	553.965	483.737
	480.175	552.843	610.096			67.268	49.605	59.391			51.864	84.065	83.222			11.327	7.365	10.385			407.124	448.622	381.586
	315.022	530.822	396.497			60.107	56.527	48.889			56.416	62.485	91.82			8.307	8.15	13.288			432.661	531.62	598.656
	433.932	224.738	304.011			61.062	62.256	60.106			74.624	51.021	76.478			6.777	7.365	11.758			289.012	630.578	636.962

## Sheet: Figure 4
The values used to build graphs
Fig 4A			ABA					Fig 4C		iPA						Fig 4E		GA3
Time	Group							Time	Group							Time	Group
	CK	Er±	S1	Er±	S2	Er±			CK	Er±	S1	Er±	S2	Er±			CK	Er±	S1	Er±	S2	Er±
2025-07-15	254.01	24.77	253.72	43.24	261.74	36.86		2025-07-15	38.03	5.63	37.42	4.54	40.41	2.35		2025-07-15	439.92	82.89	426.05	64.24	396.64	40
2025-07-31	431	68.65	517.24	116.5	533.03	155.09		2025-07-31	63.5	14.5	75.69	12.75	76.34	14.2		2025-07-31	457.14	153.96	566.2	137.63	643.35	91.11
Fig 4B			IAA					Fig 4D		ZR
Time	Group							Time	Group
	CK	Er±	S1	Er±	S2	Er±			CK	Er±	S1	Er±	S2	Er±
2025-07-15	50.02	13.55	40.18	11.74	44.38	11.96		2025-07-15	8.58	1.87	8.18	1.14	8.22	2.16
2025-07-31	56.69	15.31	72.28	12.73	65.76	7.08		2025-07-31	9.66	1.44	11.4	1.87	11.46	1.96
Primary observations
ABA					IAA					iPA					ZR					GA3
Time	Group				Time	Group				Time	Group				Time	Group				Time	Group
	CK	S1	S2			CK	S1	S2			CK	S1	S2			CK	S1	S2			CK	S1	S2
2025-07-15	247.16	260.279	285.642		2025-07-15	60.535	61.618	41.852		2025-07-15	40.67	33.281	39.58		2025-07-15	9.453	10.329	8.994		2025-07-15	417.437	451.473	447.691
	219.173	337.244	293.514			25.877	42.394	64.596			30.495	46.484	41.639			4.699	8.703	12.539			293.898	500.636	438.867
	226.17	251.533	281.269			56.473	25.877	55.932			33.16	34.492	42.85			8.494	7.16	7.869			388.443	402.31	402.31
	278.646	256.781	226.17			57.015	45.914	34.812			40.791	34.492	39.095			9.828	8.202	5.992			495.594	482.988	382.14
	272.523	213.051	287.392			37.52	35.083	38.061			35.582	39.701	36.309			8.494	6.826	7.535			530.891	305.243	380.879
	280.395	203.43	196.433			62.701	30.209	31.021			47.454	36.067	42.972			10.496	7.869	6.409			513.242	413.655	327.934
2025-07-31	464.761	451.549	211.525		2025-07-31	63.926	86.603	67.268		2025-07-31	71.758	73.275	71.758		2025-07-31	11.601	11.876	8.15		2025-07-31	327.319	662.5	774.227
	508.802	502.196	590.278			37.193	76.816	77.055			55.067	63.665	73.443			9.915	11.523	12.857			502.89	407.124	598.656
	433.932	656.339	482.377			46.74	57.959	53.424			40.906	83.727	83.053			10.268	9.719	11.876			384.778	585.887	486.929
	484.579	588.076	612.298			46.502	72.997	68.223			66.7	74.118	92.157			8.817	12.386	9.876			611.425	739.113	719.959
	301.809	601.288	627.713			61.778	85.886	66.313			58.945	98.732	88.448			7.012	14.347	14.151			241.129	643.347	652.923
	392.093	304.011	673.956			83.977	53.424	62.256			87.605	60.631	49.166			10.346	8.542	11.876			675.269	359.241	627.386

## Sheet: Figure 5
AL ABA	AL IAA	AL iPA	AL ZR	AL GA3	LL ABA	LL IAA	LL iPA	LL ZR	LL GA3
249.784	42.935	35.703	8.411	291.377	247.16	60.535	40.67	9.453	417.437
228.793	36.708	38.126	10.287	423.74	219.173	25.877	30.495	4.699	293.898
241.038	32.646	33.039	6.242	327.934	226.17	56.473	33.16	8.494	388.443
280.395	42.664	30.374	6.117	286.334	278.646	57.015	40.791	9.828	495.594
244.536	49.975	32.796	5.2	358.189	272.523	37.52	35.582	8.494	530.891
205.179	32.646	27.345	5.742	315.328	280.395	62.701	47.454	10.496	513.242
541.833	77.293	64.171	8.581	601.848	464.761	63.926	71.758	11.601	327.319
453.751	31.225	44.783	9.052	356.049	508.802	37.193	55.067	9.915	502.89
301.809	51.037	56.584	5.208	311.358	433.932	46.74	40.906	10.268	384.778
480.175	67.268	51.864	11.327	407.124	484.579	46.502	66.7	8.817	611.425
315.022	60.107	56.416	8.307	432.661	301.809	61.778	58.945	7.012	241.129
433.932	61.062	74.624	6.777	289.012	392.093	83.977	87.605	10.346	675.269
309.275	66.221	39.822	10.621	472.903	260.279	61.618	33.281	10.329	451.473
263.777	38.603	33.523	7.326	382.14	337.244	42.394	46.484	8.703	500.636
290.89	40.769	38.368	6.284	338.019	251.533	25.877	34.492	7.16	402.31
273.398	38.332	37.642	7.91	383.401	256.781	45.914	34.492	8.202	482.988
319.752	36.437	38.974	12.581	446.431	213.051	35.083	39.701	6.826	305.243
222.671	21.274	30.374	4.699	301.462	203.43	30.209	36.067	7.869	413.655
649.733	47.218	59.45	8.228	579.503	451.549	86.603	73.275	11.876	662.5
381.083	74.19	77.321	10.385	646.539	502.196	76.816	63.665	11.523	407.124
610.096	51.276	79.344	11.052	553.965	656.339	57.959	83.727	9.719	585.887
552.843	49.605	84.065	7.365	448.622	588.076	72.997	74.118	12.386	739.113
530.822	56.527	62.485	8.15	531.62	601.288	85.886	98.732	14.347	643.347
224.738	62.256	51.021	7.365	630.578	304.011	53.424	60.631	8.542	359.241
245.411	36.708	39.216	5.492	359.449	285.642	41.852	39.58	8.994	447.691
226.17	25.065	35.946	8.16	285.074	293.514	64.596	41.639	12.539	438.867
352.987	56.473	48.423	10.663	422.479	281.269	55.932	42.85	7.869	402.31
349.488	49.163	32.917	6.951	403.57	226.17	34.812	39.095	5.992	382.14
194.684	28.314	38.368	5.742	349.364	287.392	38.061	36.309	7.535	380.879
221.797	27.772	30.858	6.451	300.201	196.433	31.021	42.972	6.409	327.934
356.861	45.786	82.042	13.17	601.848	211.525	67.268	71.758	8.15	774.227
623.309	77.055	89.459	10.699	783.803	590.278	77.055	73.443	12.857	598.656
367.871	52.23	74.624	11.131	483.737	482.377	53.424	83.053	11.876	486.929
610.096	59.391	83.222	10.385	381.586	612.298	68.223	92.157	9.876	719.959
396.497	48.889	91.82	13.288	598.656	627.713	66.313	88.448	14.151	652.923
304.011	60.106	76.478	11.758	636.962	673.956	62.256	49.166	11.876	627.386

## Sheet: Table 1
The values used to build tables
Table 1			ABA/IAA					Table 1		ABA/ZR
Time	Group							Time	Group
	CK	Er±	S1	Er±	S2	Er±			CK	Er±	S1	Er±	S2	Er±
2025-07-15	6.2	0.75	7.5	1.79	7.32	0.92		2025-07-15	36.53	8.69	36.46	8.12	37.35	7.66
2025-07-31	7.82	3.08	9.16	3.64	7.73	1.55		2025-07-31	52.59	9.97	56.93	18.22	38.81	14.11
Table 1			ABA/iPA					Table 1		ABA/GA3
Time	Group							Time	Group
	CK	Er±	S1	Er±	S2	Er±			CK	Er±	S1	Er±	S2	Er±
2025-07-15	7.41	0.96	7.67	0.32	7.12	1.73		2025-07-15	0.74	0.14	0.73	0.06	0.75	0.1
2025-07-31	7.43	1.92	7.17	2.21	5.31	1.33		2025-07-31	1.09	0.26	0.9	0.32	0.81	0.37
Primary observations
	ABA/IAA					ABA/iPA					ABA/ZR					ABA/GA3
Time	Group				Time	Group				Time	Group				Time	Group
	CK	S1	S2			CK	S1	S2			CK	S1	S2			CK	S1	S2
2025-07-15	5.81772	4.67035	6.68549		2025-07-15	6.99616	7.76644	6.25793		2025-07-15	29.6973	29.1192	44.6852		2025-07-15	0.857254	0.653992	0.682742
	6.23278	6.83307	9.02334			6.00097	7.86854	6.29194			22.241	36.0056	27.7169			0.539937	0.690263	0.793373
	7.38339	7.13508	6.25054			7.29556	7.58158	7.28966			38.6155	46.2906	33.1039			0.73502	0.860573	0.835514
	6.57217	7.13237	7.10876			9.23142	7.26311	10.6172			45.8386	34.5636	50.2788			0.979258	0.713086	0.865991
	4.89317	8.77548	6.87589			7.45628	8.20424	5.07412			47.0262	25.4155	33.9053			0.682701	0.716241	0.557253
	6.28497	10.4668	7.98635			7.50335	7.33097	7.18767			35.733	47.3869	34.3818			0.650684	0.738637	0.738828
2025-07-31	7.01012	13.7603	7.79411		2025-07-31	8.44358	10.9291	4.34974		2025-07-31	63.1433	78.9661	27.0965		2025-07-31	0.900282	1.12119	0.592942
	14.5317	5.13658	8.08914			10.1322	4.92858	6.96754			50.1272	36.6955	58.2586			1.27441	0.58942	0.795237
	5.91353	11.8983	7.04329			5.33382	7.68925	4.92966			57.951	55.2023	33.0492			0.969331	1.10133	0.760477
	7.13824	11.1449	10.2725			9.25835	6.57638	7.33095			42.3921	75.0635	58.7478			1.17943	1.23231	1.59884
	5.24102	9.39059	8.11015			5.58391	8.49519	4.3182			37.9225	65.1315	29.8387			0.728104	0.998499	0.662312
	7.10642	3.6099	5.05791			5.81491	4.40481	3.97514			64.0301	30.5143	25.8557			1.50143	0.3564	0.477283

## Sheet: Table 2
The values used to build tables
Table 2			ABA/IAA					Table 2		ABA/ZR
Time	Group							Time	Group
	CK	Er±	S1	Er±	S2	Er±			CK	Er±	S1	Er±	S2	Er±
2025-07-15	5.53	1.71	6.72	1.75	6.13	1.03		2025-07-15	31.09	7.23	31.24	4.78	32.91	5.09
2025-07-31	8.37	3.17	7.3	2.02	8.18	2.44		2025-07-31	44.92	6.13	45.69	10.49	45.93	11.58
Table 2			ABA/iPA					Table 2		ABA/GA3
Time	Group							Time	Group
	CK	Er±	S1	Er±	S2	Er±			CK	Er±	S1	Er±	S2	Er±
2025-07-15	6.75	0.6	6.8	0.94	6.52	1.08		2025-07-15	0.59	0.07	0.6	0.07	0.66	0.06
2025-07-31	7.2	2.16	6.82	1.13	7.37	3.25		2025-07-31	1.03	0.28	0.94	0.19	0.86	0.27
Primary observations
	ABA/IAA					ABA/iPA					ABA/ZR					ABA/GA3
Time	Group				Time	Group				Time	Group				Time	Group
	CK	S1	S2			CK	S1	S2			CK	S1	S2			CK	S1	S2
2025-07-15	4.08293	4.22407	6.82505		2025-07-15	6.07721	7.82065	7.21683		2025-07-15	26.1462	25.1989	31.7592		2025-07-15	0.592089	0.576511	0.638034
	8.4698	7.95499	4.54384			7.18718	7.25506	7.04902			46.6425	38.7503	23.4081			0.745745	0.673631	0.668799
	4.00492	9.72033	5.02877			6.82057	7.2925	6.56404			26.627	35.1303	35.7439			0.582248	0.625222	0.699135
	4.88724	5.59265	6.4969			6.83107	7.44465	5.78514			28.3523	31.3071	37.7453			0.562247	0.531651	0.591851
	7.26341	6.07277	7.55083			7.65901	5.36639	7.91517			32.0842	31.2117	38.1409			0.513331	0.697972	0.754549
	4.47194	6.73409	6.33226			5.90877	5.64034	4.57119			26.7145	25.8521	30.6496			0.546321	0.491787	0.599002
2025-07-31	7.2703	5.21401	3.14451		2025-07-31	6.47678	6.16239	2.94775		2025-07-31	40.0621	38.022	25.954		2025-07-31	1.4199	0.681583	0.273208
	13.68	6.53765	7.66048			9.23969	7.8881	8.03723			51.3164	43.5821	45.911			1.01176	1.23352	0.986005
	9.28395	11.3242	9.02922			10.608	7.83904	5.80806			42.2606	67.5315	40.6178			1.12775	1.12025	0.990652
	10.4206	8.05617	8.97495			7.26505	7.93432	6.64407			54.9596	47.4791	61.9986			0.79254	0.795651	0.850462
	4.88538	7.001	9.46591			5.12018	6.0901	7.09697			43.0418	41.9104	44.3582			1.25165	0.934625	0.961389
	4.66905	5.69053	10.8256			4.47569	5.01412	13.7078			37.898	35.5901	56.7494			0.580647	0.846259	1.07423
